# Supplementary material for: Efficacy and Tolerability of High- versus Low-dose Lenalidomide Maintenance Therapy of Multiple Myeloma after Autologous Blood Stem Cell Transplantation
Source: Oxford University Press journal article supplement (doi:10.1158/1078-0432.ccr-20-0841), 2020-08-17
Supplement: 10780432ccr200841-sup-238609_3_supp_6473229_qttzy2.docx [file 10780432ccr200841-sup-238609_3_supp_6473229_qttzy2.docx]

**Supplement 1 Participating centers and patient enrolment**

| **Center** | **Enrolled patients** |
| --- | --- |
| University Hospital Duesseldorf | 123 |
| Helios St. Johannis Hospital Duisburg | 32 |
| University Hospital Heidelberg | 19 |
| Justus-Liebig Universität Giessen | 9 |
| Marienhospital Duesseldorf | 6 |
| University Cancer Center Hamburg | 5 |
| **Total** | **194** |
