# Supplementary material for: Efficacy and Tolerability of High- versus Low-dose Lenalidomide Maintenance Therapy of Multiple Myeloma after Autologous Blood Stem Cell Transplantation
Source: Oxford University Press journal article supplement (doi:10.1158/1078-0432.ccr-20-0841), 2020-08-17
Supplement: 10780432ccr200841-sup-238609_3_supp_6473232_q55zy2.docx [file 10780432ccr200841-sup-238609_3_supp_6473232_q55zy2.docx]

**Supplement 4 Subgroup analysis or PFS I according to age, prognostic factors and response after HDT**

**Abbreviations:** ASCT autologous stem cell transplantation; CR complete remission; ISS International staging system; MR: minimal response; PFS I: Progression-free survival from randomization; PR partial remission, sCR stringent complete remission; SD: stable disease; vgPR very good partial remission
