# Supplementary material for: Efficacy and Tolerability of High- versus Low-dose Lenalidomide Maintenance Therapy of Multiple Myeloma after Autologous Blood Stem Cell Transplantation
Source: Oxford University Press journal article supplement (doi:10.1158/1078-0432.ccr-20-0841), 2020-08-17
Supplement: 10780432ccr200841-sup-238609_3_supp_6473236_q11zy2.docx [file 10780432ccr200841-sup-238609_3_supp_6473236_q11zy2.docx]

**Supplement 7 Quality of Life GHS and utility score during LenMT**

a. Estimated utility score


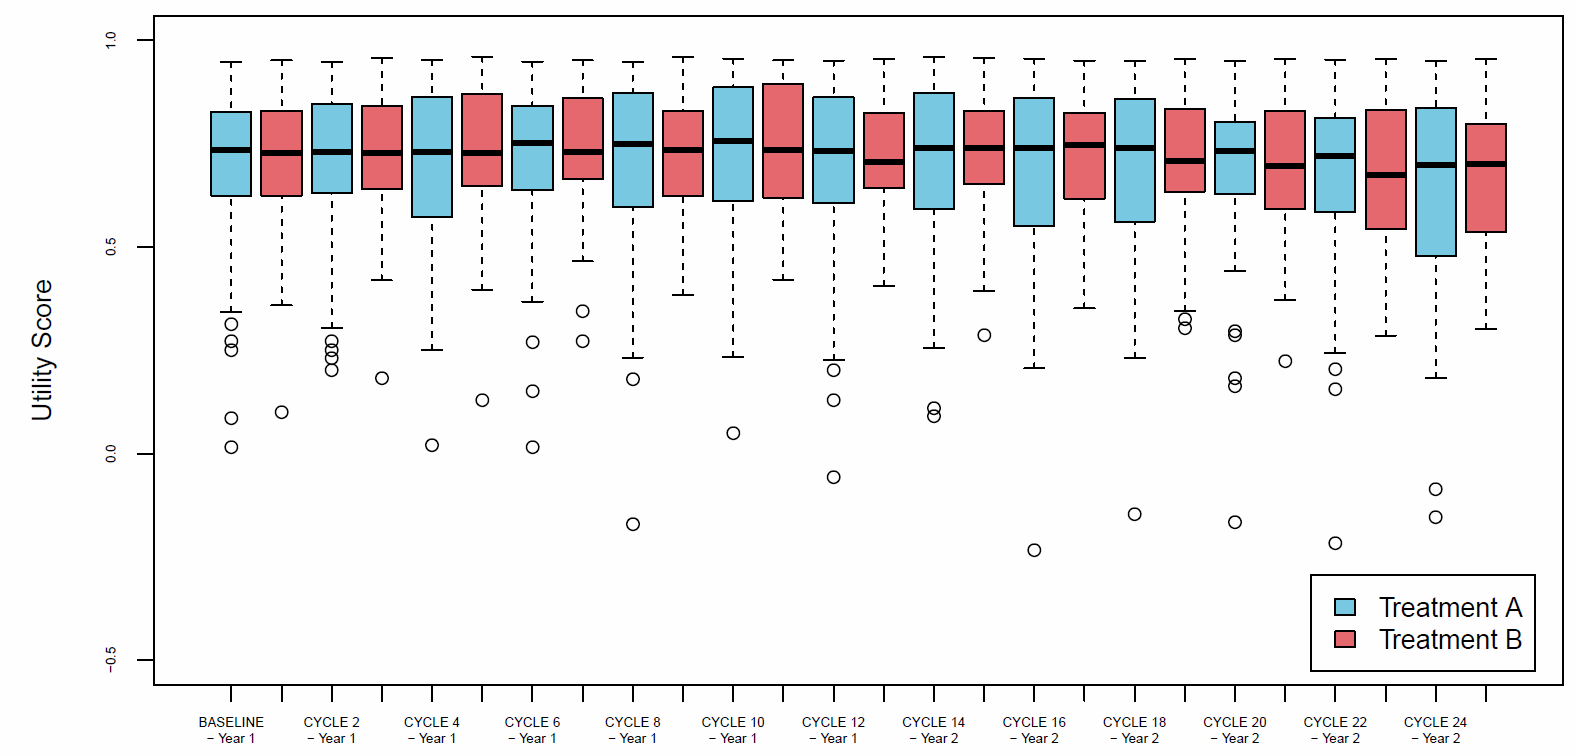


b. Global Health and QoL score


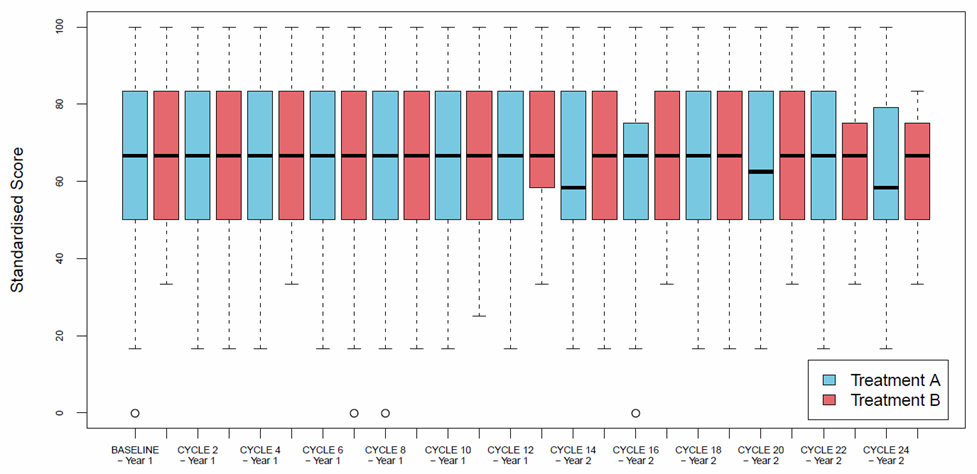


Estimated utility and Global Health Score (GHS)/Quality of Life (QoL) scores were high and remained constant throughout LenMT without significant differences between treatment arms (blue: 25 mg; red: 5 mg)
